# Supplementary figures and images for: Design and fabrication of surface-enhanced Raman scattering substrate from DNA–gold nanoparticles assembly with 2–3 nm interparticle gap
Source: Royal Society of Chemistry journal article supplement (doi:10.1039/c4ra06947a), 2014-01-01

## Supporting Information

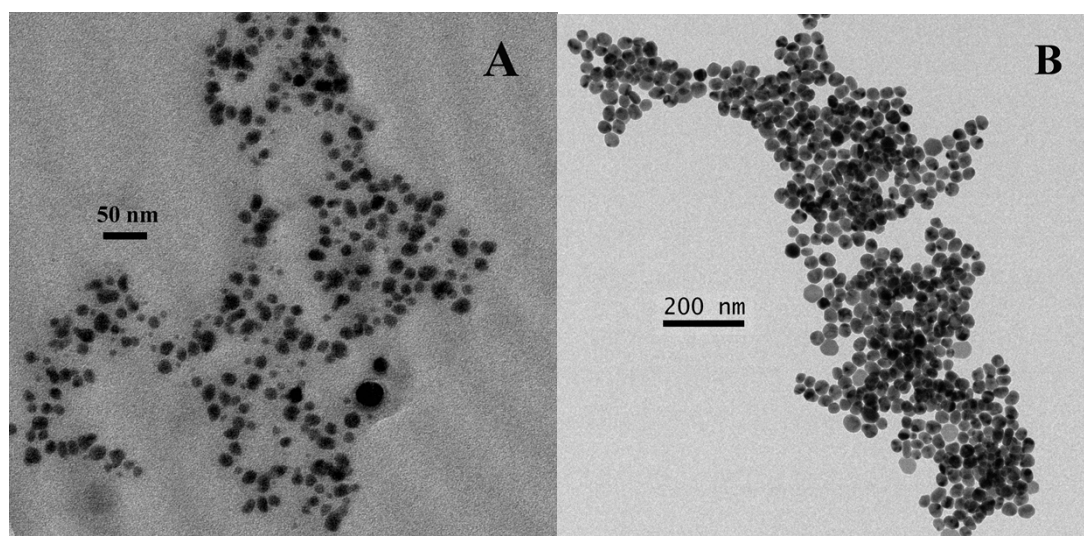

Figure S1 TEM images of DNA-Au hybrids, (A): Au: 15nm, (B): Au: 25nm

Supplement: c4ra06947a1.pdf [file c4ra06947a1.pdf]
